1 **Host Diet Influences Lethal and Sublethal Responses of Hosts to Amphibian Pathogen**

2 **Exposure**

3

4 Samantha L. Rumschlag\*<sup>1</sup> and Michelle D. Boone<sup>1</sup>

5 Department of Biology, Miami University, Oxford OH

6 \*corresponding author: rumschsl@gmail.com

7 Keywords: host-pathogen interactions, wildlife disease, host quality, *Batrachochytrium*

8 *dendrobatidis*, chytridiomycosis, anurans

9

10 ABSTRACT

11 The severity of the impacts of pathogens on hosts may be driven by environmental  
12 factors like resource availability that create tradeoffs on energetic demands for immune  
13 responses and basal metabolic activity within the host. These responses can vary among species  
14 from sublethal to lethal effects, which can have consequences for the host population trajectories  
15 within a community. Chytridiomycosis, caused by the pathogen *Batrachochytrium dendrobatidis*  
16 (or Bd), has been associated with global amphibian population declines. However, it also occurs  
17 in populations without appearing to cause mass mortality; the effect of Bd in these situations is  
18 not well understood and environmental factors like food abundance that impact host conditions  
19 could play an important role in the magnitude of the pathogen's impact. In the present study, we  
20 exposed American toad (*Anaxyrus americanus*), northern leopard frog (*Lithobates pipiens*), and  
21 Blanchard's cricket frog (*Acris blanchardi*) metamorphs to Bd and then reared them in the  
22 terrestrial habitat under low or high food environments. We found additive effects of Bd and  
23 reduced food abundance on host growth and survival that varied according to species. For  
24 instance, Bd-induced reductions in American toad survival were greater under low food  
25 conditions compared to high food conditions but survival of northern leopard frogs and  
26 Blanchard's cricket frogs was not affected by Bd. For northern leopard frogs and Blanchard's  
27 cricket frogs, low food abundance resulted in the lower growth rates under Bd exposure  
28 compared to high food abundance. Additionally, we developed stage-structured population  
29 models for American toads to assess if reduced survival of metamorphs exposed to Bd under  
30 conditions of low and high food abundance could influence population trajectories; models  
31 indicated that Bd exposure would reduce annual population growth rates by 14% under  
32 conditions of high food abundance and 21% under conditions of low food abundance. Our results

33 suggest that environmental conditions that influence resource availability for species that are  
34 sensitive or tolerant to Bd may increase the negative effects of Bd on host growth and survival,  
35 which could have important implications for how populations and communities with infected  
36 members respond over time.

37 INTRODUCTION

38 Interspecific variation in the responses of hosts to infectious pathogens can drive host-  
39 pathogen interactions with consequences for changes in host population dynamics and the  
40 transmission of pathogens throughout a community (Sait et al. 1994, Boots et al. 2003, Fenton  
41 and Pedersen 2005). When exposed to a pathogen, hosts can exhibit a wide range of responses.  
42 For instance, mortalities rates of hosts may vary among species, driving differences in population  
43 trajectories (Fenton and Pedersen 2005). In addition, sublethal effects of pathogens may have  
44 important consequences for populations and communities, and may influence the spread of  
45 disease to other hosts. Sublethal effects of pathogens, which often receive less attention in  
46 disease ecology, can reduce fecundity, increase the time to development, and may destabilize  
47 populations (Sait et al. 1994, Boots et al. 2003). Understanding the variation in both the lethal  
48 and sublethal responses of hosts across species is critical for predicting and preparing for  
49 outbreaks of infectious diseases in wildlife, yet currently we have limited information to predict  
50 patterns observed in nature. Energetic resources available for hosts that can aid in the defense  
51 against infection and disease development could be a key factor influencing disease dynamics,  
52 which may provide predictive power in forecasting impacts of infectious diseases on host  
53 populations. Under conditions in which few food resources are available, such as droughts or  
54 increases in temperature, the energy devoted to immune responses compared to basal metabolic  
55 activities (e.g. growth, development, behavior, reproduction) may be less (Blaustein et al. 2012).  
56 Tradeoffs on energetic demands between immune responses and basal metabolic activities that  
57 occur for hosts of small size may contribute to the development of sublethal or lethal effects of  
58 pathogens in hosts that are otherwise unaffected or only suffer sublethal effects.

59           The effects of chytridiomycosis, a disease caused by the fungal pathogen  
60 *Batrachochytrium dendrobatidis* (hereafter, Bd), may be magnified under conditions of low food  
61 resource availability and induce lethal and sublethal effects on amphibian hosts. Bd has been  
62 called the most damaging infectious disease on vertebrates in modern history (Murray et al.  
63 2011); the pathogen can infect upwards of 500 species of amphibians from all continents on  
64 which amphibians exist (Olson et al. 2013). Exposure of amphibian hosts to Bd can result in  
65 sublethal effects on host growth (Bielby et al. 2015, Caseltine et al. 2016), mortality (Kleinhenz  
66 et al. 2012, Wise et al. 2014), and has been linked to population declines of amphibians around  
67 the world (Berger et al. 1998, Muths et al. 2003, Lips et al. 2006). We understand less about the  
68 disease ecology of chytridiomycosis in temperate regions like the midwestern United States  
69 compared to places like Central and South America and Australia where mass mortality events  
70 have been sudden and widespread. This gap in understanding limits our perception of the range  
71 of host-pathogen interactions in this system that can structure communities and drive population  
72 dynamics.

73           Because mounting an immune response is an energetically costly process (Lochmiller  
74 and Deerenberg 2000), larger hosts with greater energetic reserves may be better able to sustain  
75 pathogenic exposures without the risk of impacts on survival and growth. Host conditions and  
76 fitness is predicted by body size across taxa (Dobson 1992, Bachman and Widemo 1999, Shine  
77 et al. 2001). For instance in amphibians, larger body size is associated with earlier time to first  
78 reproduction, increased fecundity, and increased overwinter survival (Smith 1987, Scott et al.  
79 2007, Earl and Whiteman 2015). Larger individuals, which have superior host condition, may  
80 have lower risks associated with pathogen exposure because of a better ability to mount  
81 energetically costly immune responses.

82           The impact of host size on amphibian response to pathogen exposures may be significant  
83 at metamorphosis, which is a critical time for development of the immune system of amphibians  
84 (Rollins-Smith 1998). Metamorphosis in amphibians is a time of complete reorganization of  
85 organ systems which may leave metamorphs temporarily vulnerable to pathogens (Rollins-Smith  
86 1998). Exposure of hosts to pathogens near metamorphosis may increase the risk of lethal and  
87 sublethal impacts on hosts, which may be compounded by poor host conditions driven by  
88 availability of food resources.

89           The objective of the present study is to determine the influence of host condition, as  
90 measured by body size, on the effect of exposure to Bd on three temperate species: the American  
91 toad (*Anaxyrus americanus*), the northern leopard frog (*Lithobates pipiens*), and the Blanchard's  
92 cricket frog (*Acris blanchardi*). All three species can be infected with Bd in the field (Longcore  
93 et al. 2007, Goodman and Ararso 2012, Richards-Hrdlicka et al. 2013), and American toads and  
94 northern leopard frogs suffer effects on survival or growth of Bd when exposed (Ortiz-  
95 Santaliestra et al. 2013, Wise et al. 2014, Caseltine et al. 2016). Additionally, northern leopard  
96 frogs and cricket frogs are declining in parts of their ranges, which could be linked to Bd (Hecnar  
97 and M'Closkey 1996, Rorabaugh 2005, Voordouw et al. 2010). We hypothesized low food  
98 abundance, which determines size and condition of hosts, would increase the likelihood of  
99 negative effects of Bd exposure in all three anuran species.

100

101

102

## MATERIALS AND METHODS

103 *Animal Collection and Care*

104 Six northern leopard frog (*Lithobates pipiens*) egg masses were collected on 2 April 2014  
105 from Talawanda High School Pond (39°29'16"N, 84°43'42"W). Seventeen partial egg strings of  
106 American toad (*Anaxyrus americanus*) were collected on 12 April and 18 April 2014 from Rush  
107 Run Wildlife Area (39°34'59"N, 84°37'4"W). Eggs from four amplexed Blanchard's cricket frog  
108 (*Acris blanchardi*) pairs were collected on 7 June and 9 June 2014 from a pond at Miami  
109 University's Ecology Research Center (39°31'43"N, 84°43'25"W). Eggs were held at 17°C on a  
110 12:12 h light-dark cycle until they reached the free-swimming stage (Gosner stage 25 [Gosner  
111 1960]). Tadpoles were fed ground TetraMin Tropical fish flakes (Tetra Holding) ad libitum until  
112 they were transferred to outdoor mesocosm ponds at Miami University's Ecology Research  
113 Center (Oxford, OH, USA). Thirty northern leopard frog, American toad, or Blanchard's cricket  
114 frog tadpoles, were added to mesocosms on 17 April, 22 April 2014, and 19 June 2014,  
115 respectively. Each mesocosm pond contained 1000 L water, 1 kg leaf litter, plankton inoculates,  
116 and tadpoles of a single frog species (American toad, northern leopard frogs, or Blanchard's  
117 cricket frogs), and a fiberglass screen lid. We reared American toad tadpoles in 17 mesocosm  
118 ponds, northern leopard frogs in 5 mesocosm ponds, and Blanchard's cricket frogs in 10  
119 mesocosm ponds. The number of mesocosm ponds varied because American toads were reared  
120 for multiple studies and because we anticipated variation in rates of metamorphosis among  
121 species. Tadpoles were reared in mesocosm ponds through metamorphosis when they were  
122 transferred to the laboratory. A subsample of metamorphs of each species reared in mesocosms  
123 was used in the terrestrial portion of the current study.

124 We housed frogs individually within terraria in plastic shoebox containers (41.3 x 17.8 x  
125 15.6 cm) that contained layers of pea gravel (~1.5 cm) and topsoil (~2.5 cm), a small dish for  
126 water, and an upturned dish for cover. Frogs were held at 22°C on a 14:10 h light-dark cycle.

127 Species were reared for different lengths of time because of the phenology of metamorphosis  
128 differed among species; however, all three studies were concluded at the same date on (2  
129 September 2014). This resulted in the terrestrial, post-metamorphosis portion of the experiment  
130 lasting 10 weeks for American toads, 8 weeks for northern leopard frogs, and 4 weeks for  
131 Blanchard's cricket frogs.

### 132 *Experimental Design*

133 In the terrestrial portion of the experiment, we manipulated exposure to Bd (present,  
134 absent) and food abundance (low, high) with 20 replicates of each treatment for American toads,  
135 northern leopard frogs, and Blanchard's cricket frogs for a total of 80 experimental units per  
136 species. Treatments were assigned randomly to individual frogs within a species so that the  
137 experimental unit was the individual frog.

138 We exposed post-metamorphic anurans to Bd for 12 hr on 26 June 2014 for American  
139 toads, 9 July 2014 for northern leopard frogs, 6 August 2014 for Blanchard's cricket frogs. To  
140 expose anurans to Bd, we placed individuals in ventilated plastic petri dishes with 8 mL  
141 dechlorinated water and 1 mL of the assigned treatment solution (see below). After 12 hr, frogs  
142 were returned to their assigned terrarium. We cultured Bd (isolate JEL 213 isolated from *Rana*  
143 *muscosa* in the Sierra Nevada [USA], obtained from J. Longcore, University of Maine, Orno,  
144 ME) on 1% tryptone agar plates using standard protocols (Longcore et al. 1999). Bd zoospores  
145 were harvested with 3 mL dechlorinated water. For Bd-absent treatments, we added  
146 dechlorinated water to 1% tryptone agar plates without Bd cultures. After 30 min, we collected  
147 the water from the plates into two solutions, one containing Bd zoospores and the other that was  
148 absent of Bd. We calculated zoospore concentrations using a hemocytometer, and diluted the Bd  
149 zoospore solution with dechlorinated water so that all hosts were exposed to  $1.25 \times 10^6$



150 zoospores/mL. To test for initial Bd infection, two weeks after Bd exposure, we euthanized ten  
151 anurans of each species that had been exposed to Bd (five fed on a high food diet, five fed on a  
152 low food diet) using a 1% solution of MS-222 (tricaine methanesulfonate), stored them in  
153 ethanol, and sent swabs of their bodies to the Amphibian Disease Lab at the San Diego Zoo for  
154 qPCR testing for the presence of Bd.

155         Frogs were fed calcium-dusted crickets in the terrestrial portion of the experiment three  
156 times per week. We manipulated feeding regime at two levels: low and high. Anurans in the low-  
157 feeding treatment received amount of crickets approximately equal to 2% of their mean body  
158 mass before Bd exposure. Each week that the frogs in the low-food abundance consumed all the  
159 crickets presented, we increased the amount of food by either one or two crickets or a cricket size  
160 class (0.3175 cm, 0.635 cm, and 1.27 cm). The high-food abundance was always three times as  
161 many crickets as the low treatment. High-food abundances were essentially *ad libitum* because  
162 uneaten crickets were not removed from containers. We observed survival daily, and individual  
163 frogs were weighed weekly to measure growth.

#### 164 *Statistical Analyses*

165         We tested for the effects of food abundance, Bd exposure, and the interaction of these  
166 treatments on American toad and Blanchard's cricket frog survival using logistic regression.  
167 All northern leopard frogs survived the course of the experiment indicating that food abundance,  
168 Bd exposure, and the interaction of these treatments did not impact survival. We used repeated-  
169 measures analysis of variance (ANOVA) to determine the effects of food abundance, Bd  
170 exposure, and the interaction of these treatments on log-transformed mass of northern leopard  
171 frogs and cricket frogs over the course of the experiment. We used repeated-measures ANOVA  
172 to test for the effects of food abundance and Bd exposures on log-transformed mass of American

173 toads; the interaction of food abundance and Bd exposure was not included in the statistical  
174 model because of low survival of American toads, which led to missing cells. To assess the  
175 effects of treatments on size of individuals over the course of the experiment, we used an  
176 ANOVA to test for the effects of food abundance, Bd exposure, and the interaction of these  
177 treatments on change in mass (final mass – initial mass [before Bd exposure]) of northern  
178 leopard frogs and cricket frogs. We used an ANOVA to test for the effects of food abundance  
179 and Bd exposure on change in mass (final mass – initial mass [before Bd exposure]) of American  
180 toads; the interaction of food abundance and Bd exposure was not included in the statistical  
181 model because of low survival of American toads that led to missing cells. All analyses were  
182 completed using SAS 9.2 (SAS Institute, Inc., Cary, North Carolina). ANOVAs were constructed  
183 using generalized linear models (PROC GLM) with a Gaussian distribution, and results were  
184 evaluated using Type III error with  $\alpha = 0.05$ . Logistic regressions (PROC LOGISTIC) were built  
185 with a binary distribution and a logit link function, and results were evaluated using Type III  
186 analyses of effects with  $\alpha = 0.05$ .

### 187 *Population Model*

188 To consider the influence of Bd and food abundance on host population growth, we built  
189 stage-structured Lefkovich (Caswell 2000) annual projection matrices representing female  
190 populations of American toads with a birth pulse (Biek et al. 2002). Only American toads were  
191 modeled because they were the only species for which we found significant effects of Bd on toad  
192 survival. We modeled American toads under four conditions: no exposure to Bd with high food  
193 abundance, no exposure to Bd with low food abundance, exposure to Bd with high food  
194 abundance, and exposure to Bd with low food abundance. Our models were composed of three  
195 life stages: pre-juvenile (embryo, larva, and overwintering metamorph), juvenile, and

196 reproductive adult (Biek et al. 2002). The projection matrix that representing an American toad  
 197 population under high food abundance and no exposure to Bd is:

$$\begin{bmatrix}
 0 & \begin{bmatrix} \text{probability of juvenile} \\ \text{becoming adult} \times \text{probability} \\ \text{of laying} \times \text{clutch size} \end{bmatrix} & \begin{bmatrix} \text{adult survival} \times \\ \text{probability of laying} \\ \times \text{clutch size} \end{bmatrix} \\
 \begin{bmatrix} \text{embryo survival} \times \\ \text{larval survival} \\ \times \text{metamorph survival} \end{bmatrix} & \begin{bmatrix} \text{probability of} \\ \text{remaining a juvenile} \end{bmatrix} & 0 \\
 0 & \begin{bmatrix} \text{probability of} \\ \text{juvenile} \\ \text{becoming adult} \end{bmatrix} & [\text{adult survival}]
 \end{bmatrix}$$

198 To represent the effects of reduced food abundance and Bd exposure, metamorph survival was  
 199 reduced according to our experimental results. For instance, to model low food abundance with  
 200 no Bd exposure, metamorph survival was reduced by 17% compared to metamorph survival with  
 201 high food abundance and no Bd exposure. Similarly, to represent Bd exposure under conditions  
 202 of high food abundance, metamorph survival was reduced by 72%, and to show Bd exposure  
 203 under conditions of low food abundance, we reduced metamorph survival by 94%.

204 Matrix elements consisting of vital rates of American toads or related species were taken  
 205 from the scientific literature (Table 1). Mean embryo survival rates and standard distributions are  
 206 based off observations of hatching success of American toad egg masses (Miller 1909, Harris et  
 207 al. 2000, Allran and Karasov 2001, McDaniel et al. 2004). Mean larval survival and standard  
 208 deviations are from experimental observations of Woodhouse's toad (*Anaxyrus woodhousii*)  
 209 (Boone et al. 2004) and long-term field observations of wood frogs (*Lithobates sylvantica*)  
 210 (Berven 1990). Mean metamorph survival to spring emergence and standard deviation are from  
 211 survival rates of American toad metamorphs in terrestrial enclosures where groups of 10 recently  
 212 metamorphosed toads were overwintered in 2x2 m terrestrial enclosures (Distel and Boone

213 2010). The mean juvenile survival rate and standard deviation is from an estimate of juvenile  
214 survival of boreal toads (*Anaxyrus boreas*; Biek et al. 2002).

215 To estimate the mean probability of a juvenile remaining a juvenile, we used the  
216 following formula:  $P_1 = ((1-p_i^{d_i-1}) * p_i) / (1-p_i^{d_i})$  where  $p_i$  is the annual probability of survival for  
217 a juvenile and  $d_i$  is the number of years spent as a juvenile (Crouse et al. 1987). In our model, the  
218 female American toads reach sexual maturity in 3-4 years (Acker and Krehbiel 1986, Green and  
219 Pauley 1987, Kalb and Zug 1990). We estimated the mean probability of a juvenile remaining a  
220 juvenile by taking the average of  $P_1$  when  $d_i$  equals three and  $P_1$  when  $d_i$  equals four. The formula  
221 used for the mean probability of a juvenile becoming an adult is  $P_2 = (p_i^{d_i} * (1-p_i)) / (1-p_i^{d_i})$   
222 (Crouse et al. 1987). The mean probability of a juvenile becoming an adult is the average of  $P_2$   
223 when  $d_i$  equals three and  $P_2$  when  $d_i$  equals four.

224 The mean adult survival rate and standard deviation used in the model is from an estimate  
225 of adult survival of boreal toads (*Anaxyrus boreas*; Biek et al. 2002). We assumed a probability  
226 of females laying a clutch of 1 with a standard deviation of 0. Mean clutch size and standard  
227 deviations are based off of counts of American toad clutches (Miller 1909, Kruse 1981). The  
228 models characterize female American toads, so clutch size is halved under the assumption of a  
229 1:1 sex ratio.

230 We calculated  $\lambda$ , the finite rate of increase of population growth, at stable age distribution  
231 for 2000 matrices that we generated by drawing randomly from a log-normal distribution of  
232 clutch sizes and  $\beta$ -distributions for all other vital rates. These distributions were built with 2000  
233 observations using means and standard deviations in Table 1 as in Biek et al. (2002). We used  
234 sensitivity and elasticity analyses on mean vital rates to determine how small changes in each

235 vital rate would influence  $\lambda$  when all other vital rates are held constant (De Kroon et al. 2000).

236 Modeling exercises were completed in R version 3.2.1. with code adapted from Stevens (2010).

237

238 RESULTS

239 Results from qPCR analyses revealed high infection prevalence two weeks after exposure

240 to Bd: American toads (high food: 1.0, low food: 1.0), northern leopard frogs (high food: 0.6,

241 low food: 0.8), cricket frogs (high food: 1, low food: 0.75) (species [high food abundance:

242 proportion infected, low food abundance: proportion infected]).

243 *Manipulating Food Resources and Bd Exposure*

244 Northern leopard frog ( $1.00 \pm 0$ ) and Blanchard's cricket frog ( $0.98 \pm 0.018$ ) survival was

245 not influenced by treatments or their interactions (mean survival  $\pm$  standard error) (Table 2).

246 Food abundance and Bd exposure, but not the interaction of the two treatments influenced

247 American toad survival over 70 days (Table 2). While American toads exposed to Bd

248 experienced reduced survival, American toads fed more food had a greater chance of survival in

249 both the Bd-exposed and unexposed treatments (Figure 1).

250 High food abundance significantly increased the mass of American toads, northern

251 leopard frogs, and Blanchard's cricket frogs over time (Table 3; Figure 2). Northern leopard frog

252 mass over time was also influenced by Bd exposure (Table 3) with lower mean mass of northern

253 leopard frogs exposed to Bd compared to the controls (Figure 2b). There was no effect of Bd or

254 the interaction of Bd and food abundance on mass of American toads or cricket frogs over the

255 course of the experiments (Table 3).

256 Similarly, high food abundance significantly increased the amount of mass gained in

257 American toads, northern leopard frogs, and Blanchard's cricket frogs (Table 3; Figure 3). Bd,

258 but not the interaction of food abundance and Bd, impacted change in mass of cricket frogs  
259 (Table 3); Blanchard's cricket frogs exposed to Bd gained less mass over the course of the  
260 experiment compared the control (Figure 3c).

### 261 *Population Model*

262 Bd exposure, represented as decreases in metamorph survival, decreased the finite rate of  
263 population growth  $\lambda$  over low and high food abundance, with the lowest population growth  
264 occurring under conditions of low food abundance and Bd exposure (Figure 4). The mean  
265 estimate of  $\lambda$  was 1.01 and 0.98 in the models that represented no Bd exposure under conditions  
266 high and low food abundance respectively. When we represented Bd exposure by reducing  
267 metamorph survival by 72% and 94% under conditions of high and low food abundance, the  
268 mean estimate of  $\lambda$  decreased by 14% and 21%, respectively, relative to the model of no Bd  
269 exposure and high food abundance (Figure 4).

270 Sensitivity analysis on the annual projection matrix representing populations of American  
271 toads not exposed to Bd and under conditions of high food abundance, showed that  $\lambda$  was most  
272 sensitive to changes in survival from the juvenile to adult stage followed closely by the pre-  
273 juvenile (embryo, larva, metamorph) to juvenile stage relative to the other matrix elements  
274 (Table 4). For the three other annual projection matrices representing no Bd exposure under low  
275 food abundance and Bd exposure under low or high food abundance, sensitivity analyses support  
276 that changes in the transition probability of pre-juveniles to juveniles would cause the biggest  
277 changes in  $\lambda$  (Table 4). Across the four projection matrices, elasticity analyses showed  $\lambda$  was  
278 most elastic to changes in adult survival. Small proportional changes in this transition element  
279 relative to the other elements would have the greatest impact on  $\lambda$ .

280

281 DISCUSSION

282 Change in resource availability represents perhaps one of the most widespread sources of  
283 environmental variation (e.g. Fretwell 1972). Increased frequency and intensity of droughts and  
284 extreme flow events (Barnett et al. 2005, Milly et al. 2005) associated with climate change could  
285 alter resource availability in vulnerable freshwater systems, which might result in alterations of  
286 host-pathogen interactions. Our study provides evidence demonstrating that food availability can  
287 mediate the lethal and sublethal impacts of pathogens on hosts. We found additive effects of low  
288 food abundance with Bd exposure on host growth and survival; individuals that were exposed to  
289 Bd and low food had the worst outcomes of any treatments.

290 Exposure to pathogens and fluctuations in food availability are both fundamental drivers  
291 of the health of organisms, which have consequences for population dynamics of organisms  
292 (Morin 2009). Our results show that both Bd exposure and low food availability negatively  
293 impact the growth and survival of amphibians across species. For American toads, low food  
294 abundance and Bd exposure lead to reductions in survival, with Bd exposure accounting for a  
295 larger effect compared to differences in food abundance. For northern leopard frogs and  
296 Blanchard's cricket frogs, low food abundance and Bd exposure resulted in reductions in growth,  
297 with differences in food abundance accounting for a greater effect compared to Bd exposure.  
298 Together, these results suggest that American toads are more susceptible to the effects of Bd in  
299 the post-metamorphic life stage, while northern leopard frogs and cricket frogs may be more  
300 susceptible to low food availability.

301 While the effects of pathogens on hosts can vary across species, there may be  
302 environmental conditions that increase these negative effects on host health for both tolerant and  
303 susceptible hosts. Our results demonstrate that Bd exposure and low food abundance most

304 negatively affected individual performance when applied in combination. The lowest rates of  
305 survival for American toads and growth for northern leopard frogs and Blanchard's cricket frogs  
306 resulted when Bd exposure and low food abundance were combined. These results are similar to  
307 other studies that have found an increased likelihood of mortality in anurans of small body sizes  
308 exposed to Bd (Carey et al. 2006, Garner et al. 2009). The effects of Bd on hosts of poor  
309 condition may be driven by their reduced ability to mount an effective immune response and  
310 may be a common phenomenon. Mounting an immune response is an energetically costly  
311 processes (Lochmiller and Deerenberg 2000) and energetic tradeoffs for hosts of small body  
312 sizes between host growth and survival versus immune response may exist (Blaustein et al.  
313 2012). Across species, larger hosts were better able to sustain exposure of Bd as evidenced by  
314 reduced impacts of Bd on survival or growth. Likely, these animals were better able to mount an  
315 immune response because of increased availability of energetic reserves, decreasing the impacts  
316 of Bd exposure. Our results support that host body size may be a predictor for the ability of hosts  
317 to respond to infectious pathogens and suggests that environmental conditions that reduce host  
318 condition like increased competition, drought, and pond drying anticipated with global climate  
319 change could increase the consequences of pathogens for hosts. These environmental conditions  
320 that result in reductions in prey availability may increase the effects of pathogenic exposures  
321 through changes in host condition with implications for host-pathogen interactions in this  
322 system.

323         While the impacts of Bd on temperate populations of amphibians in the Midwestern  
324 United States are generally unknown, because more research focus is given to areas in which  
325 mass mortality events have been sudden and widespread, our results indicate that increased  
326 mortality rates and decreased growth of hosts caused by pathogenic exposures under suboptimal



327 conditions may influence population trajectories for these species within a community. American  
328 toads, northern leopard frogs, and Blanchard's cricket frogs can use the same ponds for breeding  
329 and be present at ponds concurrently; combined with our research results, we propose that Bd  
330 may impact amphibian communities in subtle, but potentially dramatic ways over time through  
331 impacts on reduced fitness and recruitment. American toads may be especially vulnerable to  
332 competition by these more tolerant species under conditions of low food abundance. Population  
333 models of American toads show that decreases in metamorph survival may lead to negative  
334 impacts on population growth rates via reduced recruitment with the lowest population growth  
335 rates occurring when toads are exposed to Bd under conditions of low food abundance.

336         While Bd exposure did not influence survival of northern leopard frogs and Blanchard's  
337 cricket frogs, we are not suggesting that their population trajectories may be unaffected by Bd in  
338 natural populations. Northern leopard frogs and Blanchard's cricket frogs experienced reduced  
339 growth as a result of Bd exposure, which can lead to later time to first reproduction, decreased  
340 fecundity, and decreased overwinter survival (Smith 1987, Scott et al. 2007, Earl and Whiteman  
341 2015). Northern leopard frogs and cricket frogs are declining in parts of their ranges, and  
342 sublethal impacts of Bd exposure could contribute to these enigmatic declines (Hecnar and  
343 M'Closkey 1996, Rorabaugh 2005, Voordouw et al. 2010). The impact of infectious pathogens  
344 in the absence of mass mortality is understudied in disease ecology, even though infectious  
345 pathogens can reduce fecundity, increase time to development, and are predicted to destabilize  
346 populations (Sait et al. 1994, Boots et al. 2003).

347         Resource availability can be a major driver of community interactions across ecosystems  
348 (Morin 2009). Our results provide evidence that food abundance can additively influence the  
349 effects of pathogen exposures on lethal and sublethal impacts of pathogens on hosts. We support

350 that decreased growth and survival of hosts exposed to pathogens under conditions of low food  
351 availability may have important ramifications for host population dynamics increasing the  
352 potential for host population declines via reduced recruitment, fecundity, and overwinter  
353 survival. Monitoring amphibian communities for population-level consequences may provide  
354 insights into causes of enigmatic declines for species like the northern leopard frog and  
355 Blanchard's cricket frog, which may appear to be tolerant to Bd infection because of the lack of  
356 mass mortality events of these species in the Midwest but suffer subtle effects that impact  
357 populations. Accurate predictions of environmental disturbance that change resource availability  
358 should consider changes to host-pathogen systems if we are to design effective management  
359 strategies to protect vulnerable populations.

360

361 ACKNOWLEDGMENTS.—We are grateful to T. Hoskins, M. Youngquist, M. Dietrich, A.  
362 Christman, L. Wengler, A. Burrow, and T. Keesling for assistance in animal care and collection.  
363 We appreciate C. Williamson and E. Overholt for providing materials and lab space for culturing  
364 Bd. Funding for this research was provided by Miami University.

365

366 LITERATURE CITED

- 367 Acker, P. M., and E. B. Krehbiel. 1986. Aging *Bufo americanus* by skeletochronology. Journal  
368 of Herpetology 20:570–574.
- 369 Allran, J. W., and W. H. Karasov. 2001. Effects of atrazine on embryos, larvae, and adults of  
370 anuran amphibians. Environmental Toxicology and Chemistry 20:769–775.
- 371 Bachman, G., and F. Widemo. 1999. Relationships between body composition, body size and  
372 alternative reproductive tactics in a lekking sandpiper, the Ruff (*Philomachus pugnax*).  
373 Functional Ecology 13:411–416.
- 374 Barnett, T. P., J. C. Adam, and D. P. Lettenmaier. 2005. Potential impacts of a warming climate  
375 on water availability in snow-dominated regions. Nature 438:303–309.
- 376 Berger, L., R. Speare, P. Daszak, D. E. Green, A. A. Cunningham, C. L. Goggin, R. Slocombe,  
377 M. A. Ragan, A. D. Hyatt, K. R. McDonald, H. B. Hines, K. R. Lips, G. Marantelli, and H.  
378 Parkes. 1998. Chytridiomycosis causes amphibian mortality associated with population  
379 declines in the rain forests of Australia and Central America. Proceedings of the National  
380 Academy of Sciences of the United States of America 95:9031–9036.
- 381 Berven, K. A. 1990. Factors affecting population fluctuations in larval and adult stages of the  
382 wood frog (*Rana sylvatica*). Ecology 71:1599–1608.
- 383 Biek, R., W. C. Funk, B. A. Maxell, and L. S. Mills. 2002. What is missing in amphibian decline  
384 research: Insights from ecological sensitivity analysis. Conservation Biology 16:728–734.
- 385 Bielby, J., M. C. Fisher, F. C. Clare, G. M. Rosa, and T. W. J. Garner. 2015. Host species vary in  
386 infection probability, sub-lethal effects, and costs of immune response when exposed to an  
387 amphibian parasite. Scientific Reports 5:1–7.
- 388 Blaustein, A. R., S. S. Gervasi, P. T. J. Johnson, J. T. Hoverman, L. K. Belden, P. W. Bradley,

- 389 and G. Y. Xie. 2012. Ecophysiology meets conservation: Understanding the role of disease  
390 in amphibian population declines. *Philosophical Transactions of the Royal Society B:*  
391 *Biological Sciences* 367:1688–1707.
- 392 Boone, M. D., R. D. Semlitsch, J. F. Fairchild, and B. B. Rothermel. 2004. Effects of an  
393 insecticide on amphibians in large-scale experimental ponds. *Ecological Applications*  
394 14:685–691.
- 395 Boots, M., J. Greenman, D. Ross, R. Norman, R. Hails, and S. Sait. 2003. The population  
396 dynamical implications of covert infections in host-microparasite interactions. *Journal of*  
397 *Animal Ecology* 72:1064–1072.
- 398 Carey, C., J. E. Bruzgul, L. J. Livo, M. L. Walling, K. A. Kuehl, B. F. Dixon, A. P. Pessier, R. A.  
399 Alford, and K. B. Rogers. 2006. Experimental exposures of boreal toads (*Bufo boreas*) to a  
400 pathogenic chytrid fungus (*Batrachochytrium dendrobatidis*). *EcoHealth* 3:5–21.
- 401 Caseltine, J., S. Rumschlag, and M. Boone. 2016. Terrestrial growth of northern leopard frogs  
402 reared in the presence or absence of predators and exposed to the amphibian chytrid fungus  
403 at metamorphosis. *Journal of Herpetology* 50:404–408.
- 404 Caswell, H. 2000. *Matrix population models: Construction, analysis, and interpretation*. 2nd  
405 edition. Sinauer Associates, Sunderland, Massachusetts.
- 406 Crouse, D., L. Crowder, and H. Caswell. 1987. A stage-based population model for loggerhead  
407 sea turtles and implications for conservation. *Ecology* 68:1412–1423.
- 408 Distel, C. A., and M. D. Boone. 2010. Effects of aquatic exposure to the insecticide carbaryl are  
409 species-specific across life stages and mediated by heterospecific competitors in anurans.  
410 *Functional Ecology* 24:1342–1352.
- 411 Dobson, F. S. 1992. Body mass, structural size, and life-history patterns of the Columbian

- 412 ground squirrel. *The American Naturalist* 140:109–125.
- 413 Earl, J. E., and H. H. Whiteman. 2015. Are commonly used fitness predictors accurate? A meta-  
414 analysis of amphibian size and age at metamorphosis. *Copeia* 103:297–309.
- 415 Fenton, A., and A. B. Pedersen. 2005. Community epidemiology framework for classifying  
416 disease threats. *Emerging Infectious Diseases* 11:1815–1821.
- 417 Fretwell, S. D. 1972. Populations in a seasonal environment. *Monographs in Population Biology*.  
418 Princeton University Press, Princeton, New Jersey.
- 419 Garner, T. W. J., S. Walker, J. Bosch, S. Leech, J. M. Rowcliffe, A. A. Cunningham, and M. C.  
420 Fisher. 2009. Life history tradeoffs influence mortality associated with the amphibian  
421 pathogen *Batrachochytrium dendrobatidis*. *Oikos* 118:783–791.
- 422 Goodman, R. M., and Y. T. Ararso. 2012. Survey of ranavirus and the fungus *Batrachochytrium*  
423 *dendrobatidis* in frogs of Central Virginia, USA. *Herpetological Review* 43:78–80.
- 424 Gosner, K. L. 1960. A simplified table for staging anuran embryos larvae with notes on  
425 identification. *Herpetologica* 16:183–190.
- 426 Green, N. B., and T. K. Pauley. 1987. Amphibians and reptiles in West Virginia. University of  
427 Pittsburgh Press, Pittsburgh, Pennsylvania.
- 428 Harris, M. L., L. Chora, C. A. Bishop, and J. P. Bogart. 2000. Species- and age-related  
429 differences in susceptibility to pesticide exposure for two amphibians, *Rana pipiens*, and  
430 *Bufo americanus*. *Bulletin of Environmental Contamination and Toxicology* 64:263–270.
- 431 Hecnar, S. J., and R. T. M'Closkey. 1996. Regional dynamics and the status of amphibians.  
432 *Ecology* 77:2091–2097.
- 433 Kalb, H. J., and G. R. Zug. 1990. Age estimates for a population of American toads, *Bufo*  
434 *americanus* (Salientia: Bufonidae), in northern Virginia. *Brimleyana* 16:79–86.

- 435 Kleinhenz, P., M. D. Boone, and G. Fellers. 2012. Effects of the amphibian chytrid fungus and  
436 four insecticides on pacific treefrogs (*Pseudacris regilla*). *Journal of Herpetology* 46:625–  
437 631.
- 438 De Kroon, H., J. Van Groenendael, and J. Ehrlén. 2000. Elasticities: A review of methods and  
439 model limitations. *Ecology* 81:607–618.
- 440 Kruse, K. C. 1981. Mating success, fertilization potential, and male body size in the American  
441 toad (*Bufo americanus*). *Herpetologica* 37:228–233.
- 442 Lips, K. R., F. Brem, R. Brenes, J. D. Reeve, R. A. Alford, J. Voyles, C. Carey, L. Livo, A. P.  
443 Pessier, and J. P. Collins. 2006. Emerging infectious disease and the loss of biodiversity in a  
444 Neotropical amphibian community. *Proceedings of the National Academy of Sciences of*  
445 *the United States of America* 103:3165–3170.
- 446 Lochmiller, R. L., and C. Deerenberg. 2000. Trade-offs in evolutionary immunology: Just what  
447 is the cost of immunity? *Oikos* 88:87–98.
- 448 Longcore, J. E., A. P. Pessier, and D. K. Nichols. 1999. *Batrachochytrium dendrobatidis* gen. et  
449 sp. nov., a chytrid pathogenic to amphibians. *Mycologia* 91:219–227.
- 450 Longcore, J. R., J. E. Longcore, A. P. Pessier, and W. A. Halteman. 2007. Chytridiomycosis  
451 widespread in anurans of northeastern United States. *Journal of Wildlife Management*  
452 71:435–444.
- 453 McDaniel, T. V., P. A. Martin, N. Ross, S. Brown, S. Lesage, and B. D. Pauli. 2004. Effects of  
454 chlorinated solvents on four species of North American amphibians. *Archives of*  
455 *Environmental Contamination and Toxicology* 47:101–109.
- 456 Miller, N. 1909. The American toad (*Bufo lentiginosus americanus*, LeConte) a study in  
457 dynamic biology. *The American Naturalist* 43:641–668.

- 458 Milly, P. C. D., K. A. Dunne, and A. V Vecchia. 2005. Global patterns of trends in streamflow  
459 and water availability in a changing climate. *Nature* 438:347–350.
- 460 Morin, P. J. 2009. *Community Ecology*. Blackwell Science, Inc., Malden, Massachusetts.
- 461 Murray, K. A., R. W. R. Retallick, R. Puschendorf, L. F. Skerratt, D. Rosauer, H. I. McCallum,  
462 L. Berger, R. Speare, and J. VanDerWal. 2011. Assessing spatial patterns of disease risk to  
463 biodiversity: Implications for the management of the amphibian pathogen,  
464 *Batrachochytrium dendrobatidis*. *Journal of Applied Ecology* 48:163–173.
- 465 Muths, E., P. S. Corn, A. P. Pessier, and D. E. Green. 2003. Evidence for disease-related  
466 amphibian decline in Colorado. *Biological Conservation* 110:357–365.
- 467 Olson, D. H., D. M. Aanensen, K. L. Ronnenberg, C. I. Powell, S. F. Walker, J. Bielby, T. W. J.  
468 Garner, G. Weaver, and M. C. Fisher. 2013. Mapping the global emergence of  
469 *Batrachochytrium dendrobatidis*, the amphibian chytrid fungus. *PLoS ONE* 8.
- 470 Ortiz-Santaliestra, M. E., T. a. G. Rittenhouse, T. L. Cary, and W. H. Karasov. 2013.  
471 Interspecific and postmetamorphic variation in susceptibility of three North American  
472 anurans to *Batrachochytrium dendrobatidis*. *Journal of Herpetology* 47:286–292.
- 473 Richards-Hrdlicka, K. L., J. L. Richardson, and L. Mohabir. 2013. First survey for the amphibian  
474 chytrid fungus *Batrachochytrium dendrobatidis* in Connecticut (USA) finds widespread  
475 prevalence. *Diseases of Aquatic Organisms* 102:169–180.
- 476 Rollins-Smith, L. A. 1998. Metamorphosis and the amphibian immune system. *Immunological*  
477 *Reviews* 166:221–230.
- 478 Rorabaugh, J. 2005. *Rana pipiens* Schreber, 1782; northern leopard frog. Pages 570–577 in M.  
479 Lannoo, editor. *Amphibian Declines: The Conservation Status of United States Species*.  
480 University of California Press, Berkeley, CA.

- 481 Sait, S. M., M. Begon, and D. J. Thompson. 1994. The effects of a sublethal baculovirus  
482 infection in the Indian meal moth, *Plodia interpunctella*. *Journal of Animal Ecology*  
483 63:541–550.
- 484 Scott, D. E., E. D. Casey, M. F. Donovan, and T. K. Lynch. 2007. Amphibian lipid levels at  
485 metamorphosis correlate to post-metamorphic terrestrial survival. *Oecologia* 153:521–532.
- 486 Shine, R., M. P. LeMaster, I. T. Moore, M. M. Olsson, and R. T. Mason. 2001. Bumpus in the  
487 snake den: Effects of sex, size, and body condition on mortality of red-sided garter snakes.  
488 *Evolution* 55:598–604.
- 489 Smith, D. C. 1987. Adult recruitment in chorus frogs: Effects of size and date at metamorphosis.  
490 *Ecology* 68:344–350.
- 491 Stevens, M. H. 2010. *A Primer of Ecology with R*. Second printing. Springer Science+Business  
492 Media, New York, New York.
- 493 Voordouw, M. J., D. Adama, B. Houston, P. Govindarjulu, and J. Robinson. 2010. Prevalence of  
494 the pathogenic chytrid fungus, *Batrachochytrium dendrobatidis*, in an endangered  
495 population of northern leopard frogs, *Rana pipiens*. *BMC Ecology* 10:1–10.
- 496 Wise, R. S., S. L. Rumschlag, and M. D. Boone. 2014. Effects of amphibian chytrid fungus  
497 exposure on American toads in the presence of an insecticide. *Environmental Toxicology*  
498 *and Chemistry* 33:2541–2544.
- 499
- 500



501 TABLES AND FIGURES

502 Table 1. Mean vital rates, matrix elements, and corresponding standard deviations (SD) of stage-  
 503 structured Lefkovitch projection matrices representing an American toad population. Vital rates  
 504 and matrix elements represent annual transitions for females with the exception of embryo,  
 505 larval, and metamorph survival, which combined represent a single year.

| Vital rate                        | Mean                    | SD                      |
|-----------------------------------|-------------------------|-------------------------|
| Embryo survival                   | 0.85 <sup>1,2,3,4</sup> | 0.05 <sup>1,2,3,4</sup> |
| Larval survival                   | 0.05 <sup>5,6</sup>     | 0.06 <sup>5,6</sup>     |
| Metamorph survival                | 0.29 <sup>7</sup>       | 0.20 <sup>7</sup>       |
| Juvenile survival <sup>a</sup>    | 0.26 <sup>8</sup>       | 0.04 <sup>8</sup>       |
| Juvenile to juvenile <sup>b</sup> | 0.25 <sup>9</sup>       | 0.04 <sup>8</sup>       |
| Juvenile to adult <sup>c</sup>    | 0.008 <sup>9</sup>      | 0.007 <sup>8</sup>      |
| Adult survival                    | 0.78 <sup>8</sup>       | 0.07 <sup>8</sup>       |
| Probability of laying             | 1                       | —                       |
| Clutch size                       | 5673 <sup>1,10</sup>    | 2484 <sup>1,10</sup>    |
| Age at sexual maturity (years)    | 3-4 <sup>12,13,14</sup> | —                       |

506 <sup>b</sup>The sum of the probability of a juvenile remaining a juvenile and the probability of a juvenile  
 507 becoming an adult.

508 <sup>c</sup>The probability of a juvenile enduring as a juvenile

509 <sup>d</sup>The probability of a juvenile transitions to an adult

510 <sup>1</sup>Miller 1909

511 <sup>2</sup>Harris et al. 2000

512 <sup>3</sup>Allran and Karsov 2001

- 513 <sup>4</sup>*McDaniel et al. 2004*
- 514 <sup>5</sup>*Boone et al. 2004*
- 515 <sup>6</sup>*Berven 1990*
- 516 <sup>7</sup>*Distel and Boone 2010*
- 517 <sup>8</sup>*Biek et al. 2002*
- 518 <sup>9</sup>*Crouse et al. 1987*
- 519 <sup>10</sup>*Kruse 1981*
- 520 <sup>11</sup>*Acker et al. 1986*
- 521 <sup>12</sup>*Green and Pauley 1987*
- 522 <sup>13</sup>*Kalb and Zug 1990*
- 523

524 Table 2. Summary of logistic regressions assessing the impact of food (low, high) and Bd  
525 (absent, exposed) treatments and their interaction on survival of American toads (*Anaxyrus*  
526 *americanus*) and northern cricket frog (*Acris blanchardi*). All northern leopard frogs (*Lithobates*  
527 *pipiens*) survived.

| Species       | Response | Source of Variation | df | Wald Chi-Square | P       |
|---------------|----------|---------------------|----|-----------------|---------|
| American toad | Survival | Food                | 1  | 4.0484          | 0.0442  |
|               |          | Bd                  | 1  | 25.1500         | <0.0001 |
|               |          | Food X Bd           | 1  | 0.2607          | 0.6096  |
| Cricket frog  | Survival | Food                | 1  | 0.0011          | 0.9739  |
|               |          | Bd                  | 1  | 0.0011          | 0.9739  |
|               |          | Food X Bd           | 1  | 0.0011          | 0.9739  |

528

529

530 Table 3. Summary of repeated measures ANOVAs and ANOVAs of the impacts of food (low,  
 531 high) and Bd (absent, exposed) treatments and their interaction on mass over time and change in  
 532 mass (final mass - initial mass) on American toads (*Anaxyrus americanus*), northern leopard  
 533 frogs (*Lithobates pipiens*), and cricket frogs (*Acris blanchardi*).

| Species               | Response       | Source of Variation | df          | F   | P       |         |
|-----------------------|----------------|---------------------|-------------|-----|---------|---------|
| American toad         | Mass over time | Between subjects    | Food        | 1   | 33.85   | <0.0001 |
|                       |                |                     | Bd          | 1   | 1.98    | 0.1685  |
|                       |                |                     | Error       | 34  |         |         |
|                       |                | Within subjects     | Time        | 10  | 266.25  | <0.0001 |
|                       |                |                     | Time X Food | 10  | 70.45   | <0.0001 |
|                       |                |                     | Time X Bd   | 10  | 0.61    | 0.8045  |
|                       |                |                     | Error       | 340 |         |         |
|                       |                | Change in mass      | Food        | 1   | 76.89   | <0.0001 |
|                       |                |                     | Bd          | 1   | 1.42    | 0.2417  |
|                       |                |                     | Error       | 36  |         |         |
| Northern leopard frog | Mass over time | Between subjects    | Food        | 1   | 230.35  | <0.0001 |
|                       |                |                     | Bd          | 1   | 7.16    | 0.0091  |
|                       |                |                     | Food X Bd   | 1   | 2.17    | 0.1444  |
|                       |                |                     | Error       | 76  |         |         |
|                       |                | Within subjects     | Time        | 8   | 2522.03 | <0.0001 |
|                       |                |                     | Time X Food | 8   | 219.94  | <0.0001 |
|                       |                |                     | Error       |     |         |         |

|              |                  |                  |     |        |         |
|--------------|------------------|------------------|-----|--------|---------|
|              |                  | Time X Bd        | 8   | 2.45   | 0.0128  |
|              |                  | Time X Food X Bd | 8   | 0.39   | 0.928   |
|              |                  | Error            | 608 |        |         |
|              | Change in mass   | Food             | 1   | 538.6  | <0.0001 |
|              |                  | Bd               | 1   | 0.3    | 0.5837  |
|              |                  | Food X Bd        | 1   | 0.05   | 0.8299  |
|              |                  | Error            | 76  |        |         |
| Cricket frog | Mass over time   |                  |     |        |         |
|              | Between subjects | Food             | 1   | 28.73  | <0.0001 |
|              |                  | Bd               | 1   | 0.22   | 0.6429  |
|              |                  | Food X Bd        | 1   | 0.49   | 0.4847  |
|              |                  | Error            | 73  |        |         |
|              | Within subjects  | Time             | 4   | 262.54 | <0.0001 |
|              |                  | Time X Food      | 4   | 56.88  | <0.0001 |
|              |                  | Time X Bd        | 4   | 2.06   | 0.0865  |
|              |                  | Time X Food X Bd | 4   | 0.27   | 0.898   |
|              |                  | Error            | 292 |        |         |
|              | Change in mass   | Food             | 1   | 225.98 | <0.0001 |
|              |                  | Bd               | 1   | 5.25   | 0.0248  |
|              |                  | Food X Bd        | 1   | 0.52   | 0.4747  |
|              |                  | Error            | 76  |        |         |

---

534

535

536 Table 4. Sensitivity and elasticity values for projection matrices representing the following  
 537 conditions: high food and no Bd exposure, low food and no Bd exposure, high food and Bd  
 538 exposure, low food and Bd exposure. The first numbers listed in a column refers to sensitivity  
 539 values, and the second refers to elasticity values. The greatest sensitivity and elasticity values for  
 540 each model are in bold.

| <i>High Food, No Bd Exposure</i> |               |               |              |
|----------------------------------|---------------|---------------|--------------|
|                                  | Pre-juvenile  | Juvenile      | Adult        |
| Pre-juvenile                     | -             | 0.003         | 0.000        |
|                                  | <i>19.592</i> | 0.066         | 0.152        |
| Juvenile                         | 0.217         | 0.281         | -            |
|                                  |               | <b>20.393</b> | 0.502        |
| Adult                            | -             | 0.063         | -            |
|                                  |               | 0.152         | <b>0.350</b> |
| <i>Low Food, No Bd Exposure</i>  |               |               |              |
| Pre-juvenile                     | -             | 0.003         | 0.000        |
|                                  | <b>21.063</b> | 0.056         | 0.147        |
| Juvenile                         | 0.202         | 0.264         | -            |
|                                  |               | 0.062         | -            |
| Adult                            | -             | 18.977        | 0.533        |
|                                  |               | 0.147         | <b>0.387</b> |
| <i>High Food, Bd Exposure</i>    |               |               |              |
| Pre-juvenile                     | -             | 0.001         | 0.000        |
|                                  | <b>30.341</b> | 0.016         | 0.100        |
| Juvenile                         | 0.116         | 0.160         | -            |
|                                  |               | 0.045         | -            |
| Adult                            | -             | 10.850        | 0.724        |
|                                  |               | 0.100         | <b>0.624</b> |
| <i>Low Food, Bd Exposure</i>     |               |               |              |
| Pre-juvenile                     | -             | 0.000         | 0.000        |
|                                  | <b>40.186</b> | 0.001         | 0.033        |
| Juvenile                         | 0.035         | 0.050         | -            |
|                                  |               | 0.016         | -            |
| Adult                            | -             | 3.236         | 0.915        |
|                                  |               | 0.033         | <b>0.882</b> |

541

542

543 Figure 1. Survival over 70 days of American toads (*Anaxyrus americanus*) that were given  
544 different amount of food (low, high) and Bd treatments (absent, exposed). Plotted values are  
545 means  $\pm$  binomial SE.

546

547 Figure 2. Mass over the course of the experiments of A) American toads (*Anaxyrus americanus*)  
548 in response to low and high food abundances, B) northern leopard frogs (*Lithobates pipiens*) in  
549 response to food (low, high) and Bd treatments (absent, exposed), and C) Blanchard's cricket  
550 frogs (*Acris blanchardi*) in response to low and high food abundances. Plotted values are means  
551  $\pm$  SE.

552

553 Figure 3. Change in mass (final mass – initial mass) of A) American toads (*Anaxyrus*  
554 *americanus*) in response to low and high food abundances, B) northern leopard frogs (*Lithobates*  
555 *pipiens*) in response to low and high food abundances, and C) Blanchard's cricket frogs (*Acris*  
556 *blanchardi*) in response to low and high food abundances. Plotted values are means  $\pm$  SE.

557

558 Figure 4. Mean estimates of  $\lambda$  with 95% confidence intervals for American toad populations that  
559 represent the influence of food abundance (low, high) and Bd exposure (absent, exposed) on  
560 metamorph survival to the juvenile stage.

561

562

563 Figure 1.

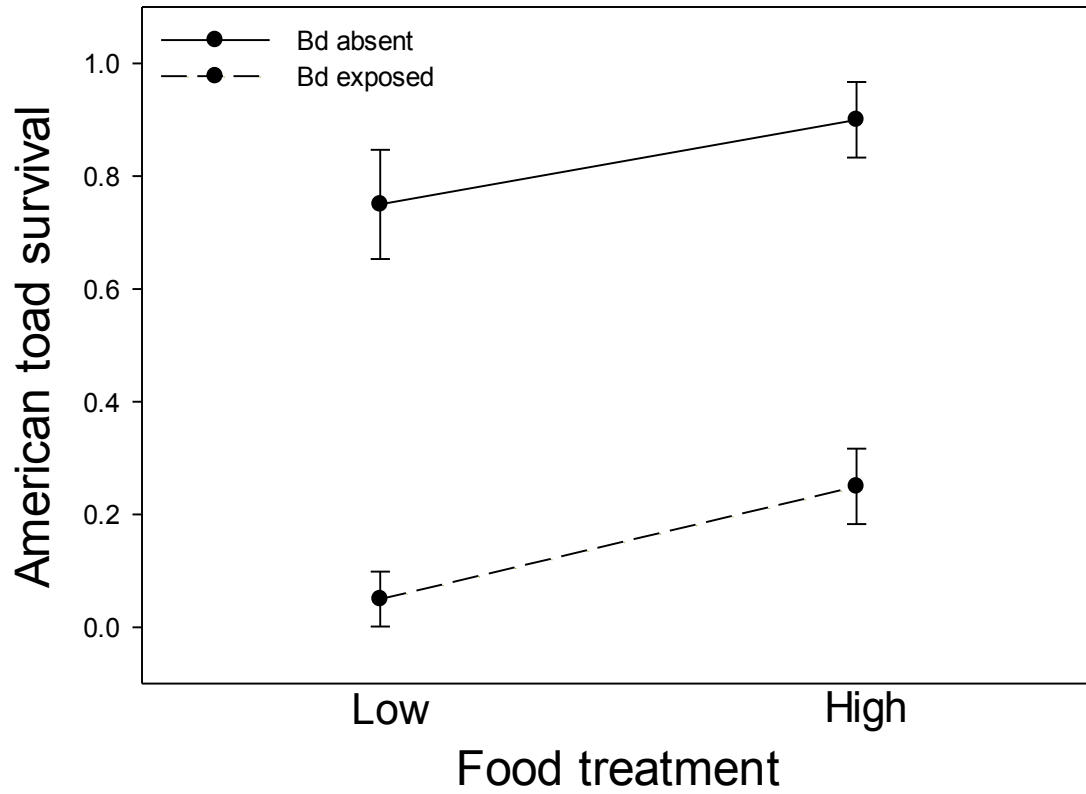

564

565



566 Figure 2.

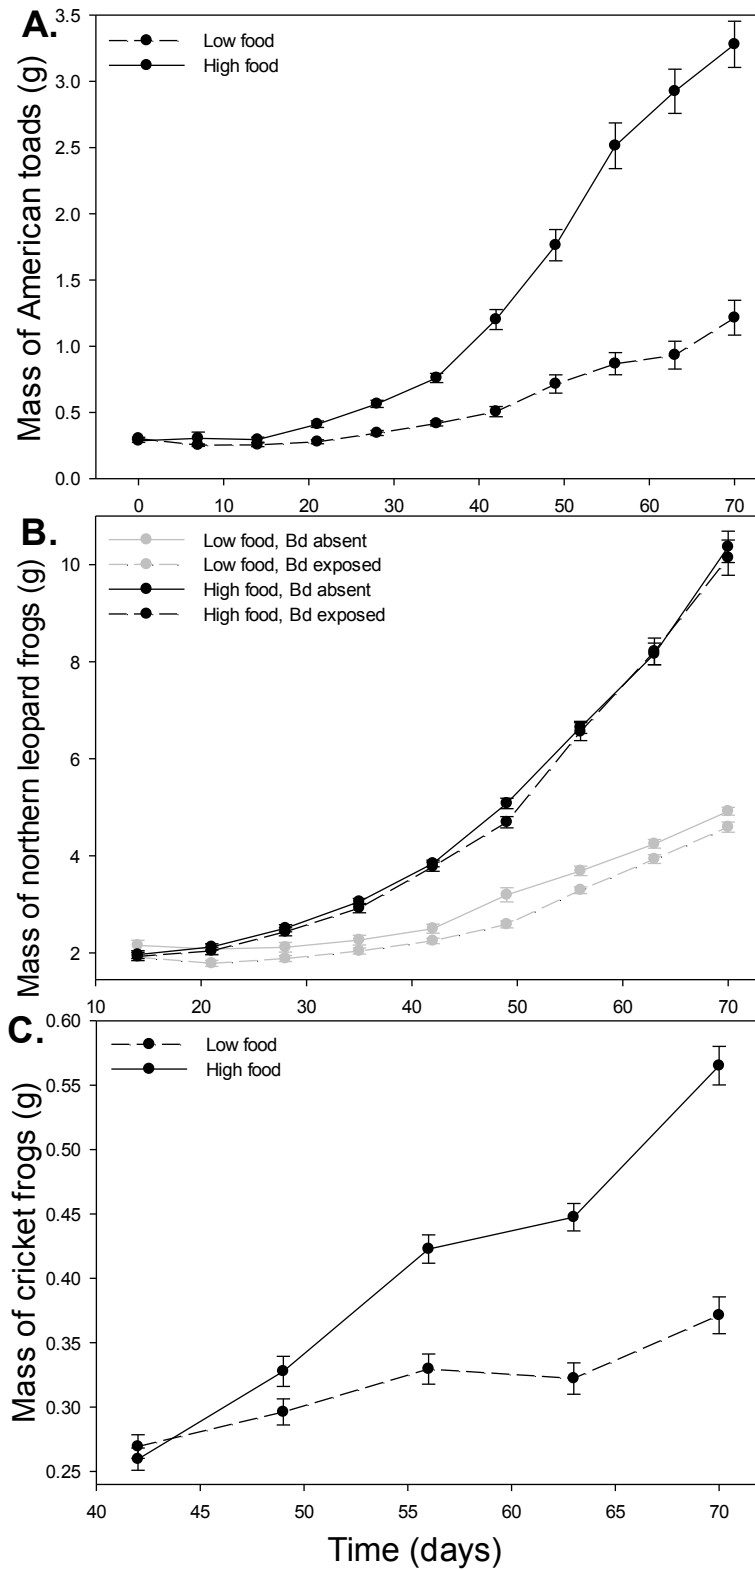

568 Figure 3.

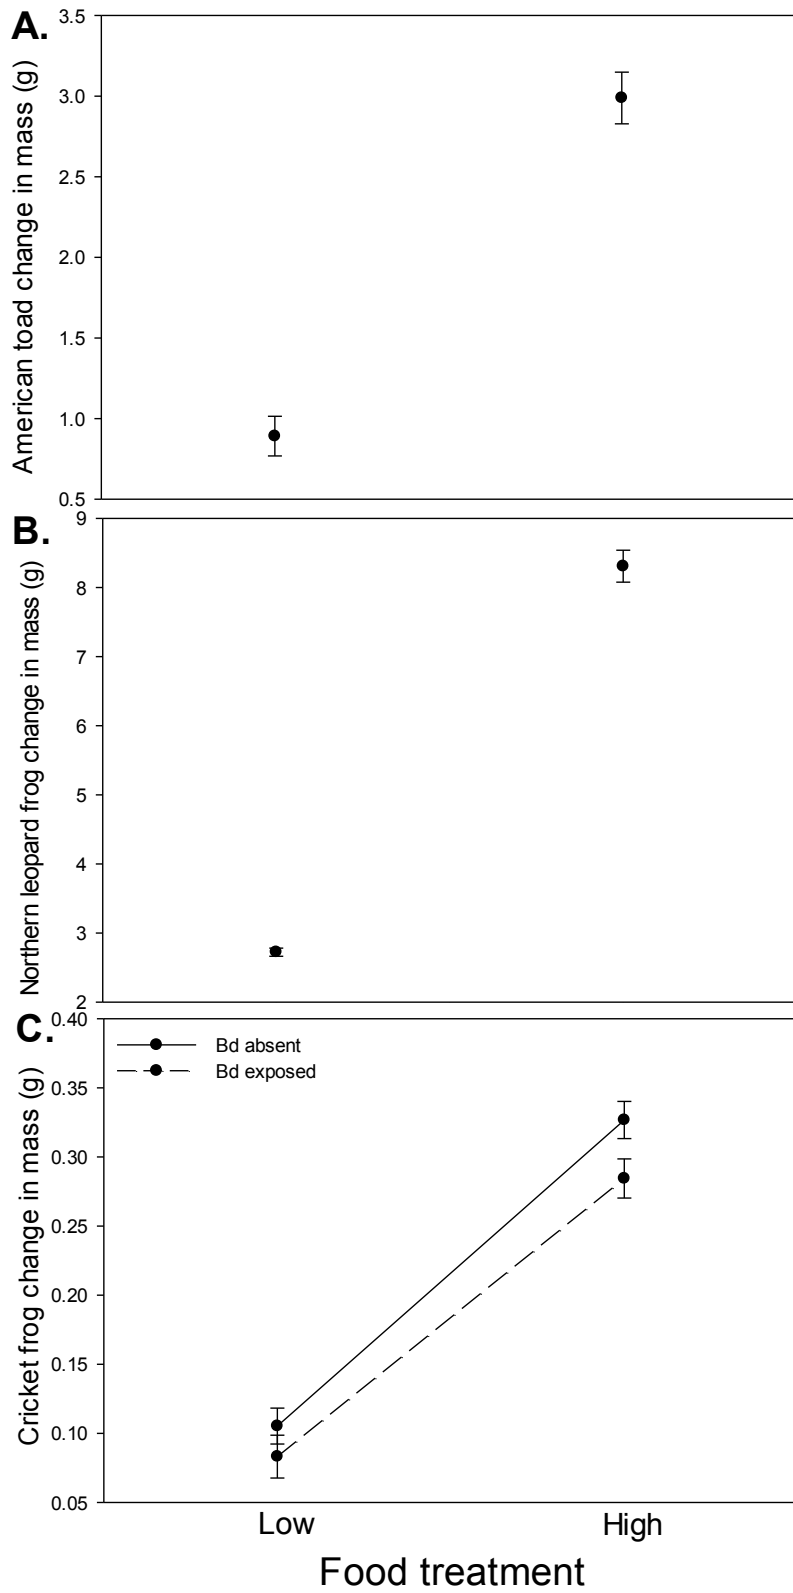

570 Figure 4.

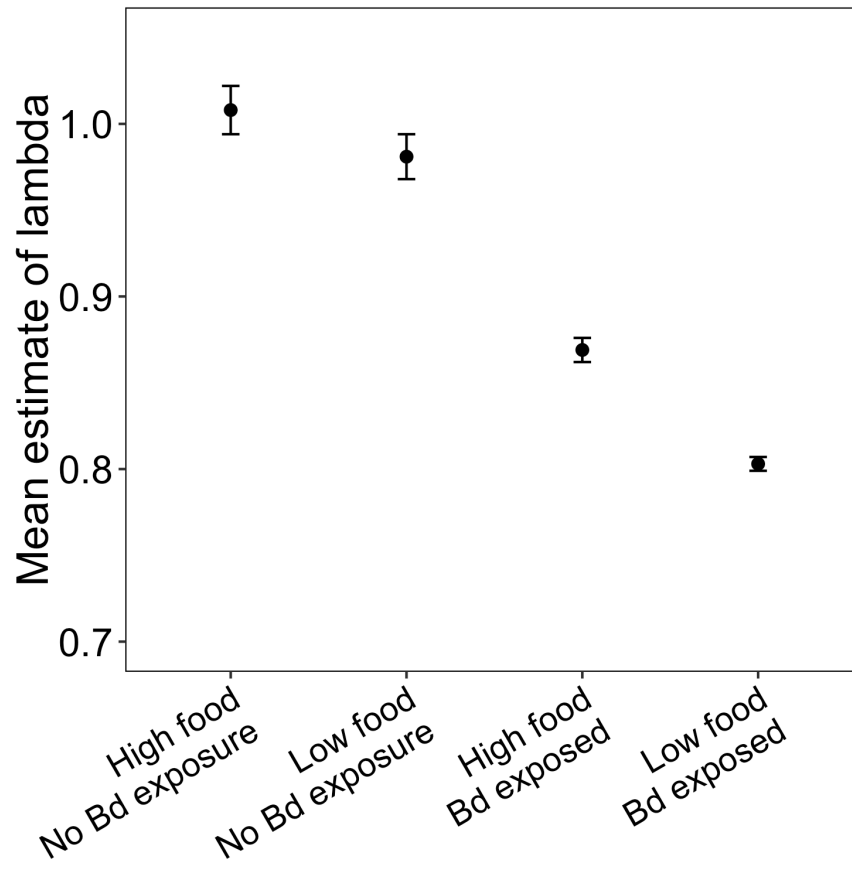

571
